# Supplementary material
Source: publisher figshare collection journal article supplement (https://acs.figshare.com/ndownloader/files/6907274)
Supplement: Supplementary file 1 [file 6907274]

## SUPPORTING INFORMATION

### **Ligating Dopamine as Signal Trigger onto the Substrate *via* Metal-Catalyst-Free Click Chemistry for “Signal-on” Photoelectrochemical Sensing of Ultralow MicroRNA Levels**

Cui Ye<sup>†</sup>, Min Qiang Wang<sup>‡</sup>, Zhong Feng Gao<sup>†</sup>, Ying Zhang<sup>†</sup>, Jing Lei Lei<sup>‡</sup>, Hong Qun Luo<sup>\*†</sup>, and Nian Bing Li<sup>\*†</sup>

<sup>†</sup> Key Laboratory of Eco-environments in Three Gorges Reservoir Region (Ministry of Education), School of Chemistry and Chemical Engineering, Southwest University, Chongqing 400715, People's Republic of China

<sup>‡</sup> Institute for Clean Energy & Advanced Materials, Faculty of Materials and Energy, Southwest University, Chongqing 400715, People's Republic of China

<sup>†</sup> School of Chemistry and Chemical Engineering, Chongqing University, Chongqing 400044, People's Republic of China

---

\* Corresponding author. Tel: +86 23 68253237; Fax: +86 23 68253237;  
E-mail address: [linb@swu.edu.cn](mailto:linb@swu.edu.cn) (N. B. Li), [luohq@swu.edu.cn](mailto:luohq@swu.edu.cn) (H.Q. Luo)

## Contents

|                                                                                          |             |
|------------------------------------------------------------------------------------------|-------------|
| <b>Chemicals and Reagents.....</b>                                                       | <b>S-3</b>  |
| <b>Apparatus.....</b>                                                                    | <b>S-3</b>  |
| <b>Preparation of Bi<sub>2</sub>S<sub>3</sub>@MoS<sub>2</sub> Nanoflowers.....</b>       | <b>S-4</b>  |
| <b>Self-Assembly of Tetrahedral DNA Nanostructure at the Modified Electrode.....</b>     | <b>S-4</b>  |
| <b>Preparation of Signal Probe.....</b>                                                  | <b>S-5</b>  |
| <b>CV and PEC Characterization of the PEC Biosensor.....</b>                             | <b>S-5</b>  |
| <b>Experimental Details for Optimal Analytical Performance of the PEC Biosensor.....</b> | <b>S-6</b>  |
| <b>Clarify Contribution of HCR to Signal Amplification.....</b>                          | <b>S-7</b>  |
| <b>Effect of the Amount of TSP.....</b>                                                  | <b>S-8</b>  |
| <b>Certification of the Rational Design to Conduct CC after HCR.....</b>                 | <b>S-9</b>  |
| <b>Comparison with Reported MiRNA Detection Methods.....</b>                             | <b>S-9</b>  |
| <b>Matrix Effect.....</b>                                                                | <b>S-10</b> |
| <b>The Number of Copies of MiRNA-141 per Cell.....</b>                                   | <b>S-10</b> |
| <b>References.....</b>                                                                   | <b>S-10</b> |

**Chemicals and Reagents.** All oligonucleotides were synthesized and purified by Sangon Inc. (Shanghai, China), and the sequences are shown in Table 1. 2-Amino-2-(hydroxymethyl)-1,3-propanediol (Tris), 6-mercaptohexanol (MCH),  $\text{HAuCl}_4 \cdot 4\text{H}_2\text{O}$ , (1-ethyl-3-[3-dimethylaminopropyl]carbodiimide hydrochloride) (EDC), N-hydroxysuccinimide (NHS), dopamine (DA), L-cysteine (L-cys), histidine (His), L-glutathione oxidized (GSSG), and Tris(2-carbozyethyl)phosphine hydrochloride (TCEP) were purchased from Sigma-Aldrich (St. Louis, MO), and used without further purification. Other reagents of analytical reagent grade were purchased from Chengdu Kelong Chemical Reagents Factory (Chengdu, China) and used as received. All solutions were prepared by ultrapure water with a resistivity of 18.2 M $\Omega$  cm. The experiment temperature was kept with an SD-101-005DB super digital thermostat bath purchased from Sida Experimental Equipment Ltd., Chongqing, China. The colloidal gold nanoparticles (GNPs) were prepared by reducing  $\text{HAuCl}_4$  (1 wt.%) with 2.2 mM sodium citrate at 100 °C for half an hour. Ferricyanide solution ( $\text{Fe}(\text{CN})_6^{3-/4-}$ , 5 mM) was obtained by dissolving potassium ferricyanide and potassium ferrocyanide in 0.1 M phosphate buffer (0.1 M KCl, 0.1 M  $\text{KH}_2\text{PO}_4$ , 0.1 M  $\text{Na}_2\text{HPO}_4$ , pH 7.4).

**Table S1. Sequence Information for the Nucleic Acids Used in This Study.**

| Name                 | Sequence (5'-3')                                                                    |
|----------------------|-------------------------------------------------------------------------------------|
| MiRNA-141            | UAA CAC UGU CUG GUA AAG AUG G                                                       |
| miR-200a             | UAACACUGUCUGGUAACGAUGU.                                                             |
| miR-200b             | UAAUACUGCCUGGUAUAUGAUGA.                                                            |
| miR-200c             | UAAUACUGCCGGGUAUAUGAUGGA                                                            |
| miR-429              | UAAUACUGUCUGGUAACCGU                                                                |
| Tetrahedron A        | ACATTCCTAAGTCTGAAACATTACAGCTTGCTACACGAGAAGAGCCGCCATAGTATTAGCT<br>CACCATCTTTACTGAGCT |
| Tetrahedron B        | SH-C <sub>6</sub> -TATCACCAGGCAGTTGACAGTGTAGCAAGCTGTAATAGATGCGAGGGTCCAATAC          |
| Tetrahedron C        | SH-C <sub>6</sub> -TCAACTGCCTGGTGATAAACGACACTACGTGGGAATCTACTATGGCGGCTCTTC           |
| Tetrahedron D        | SH-C <sub>6</sub> -TTCAGACTTAGGAATGTGCTTCCACGTAAGTGTCTGTTGTATTGGACCCTCGCAT          |
| H1                   | TTATGAGCTATATTGAAACAGCTCATAACACTGTCTGA-DBCO                                         |
| H2                   | DBCO-GTTTCAATATAGCTCATAATCAGACAGTGTATGAGCT                                          |
| H1'                  | COOH-TTATGAGCTATATTGAAACAGCTCATAACACTGTCTGA                                         |
| H2'                  | COOH-GTTTCAATATAGCTCATAATCAGACAGTGTATGAGCT                                          |
| Probe-N <sub>3</sub> | COOH-AGAGCGA-N <sub>3</sub>                                                         |

**Apparatus.** The morphologies and structures were respectively characterized by field-emission scanning electron microscopy (FESEM) with JEOL-7800F and energy-dispersive X-ray spectroscopy (EDS) with INCA X-Max 250 (Japan Electron Optics Laboratory Co., Japan). The transmission electron microscopy (TEM) image was obtained using a JEM-2100 (TEM, JEOL-2100, Japan) equipped with a field emission gun (FEG) at 200 kV. The X-ray diffraction pattern (XRD) was investigated by an XRD-7000 with Cu K $\alpha$  source radiation at a scanning rate of 2° min<sup>-1</sup> from 10° to 80° (Shimadzu, Japan). X-ray photoelectron spectroscopy (XPS) analysis was obtained on the Thermo ESCALAB 250Xi spectrometer with Al K $\alpha$  X-ray (1486.6 eV) as the light source

(Thermoelectricity Instruments, USA). PEC measurements were carried out with PEAC 200A (Tianjin AiDa Hengsheng Technology Co., Ltd., China). Electrochemical measurements were recorded on a CHI 660D electrochemical workstation (Shanghai Chenhua Instruments Co., China). And the three-electrode cell contains a modified glassy carbon electrode (GCE,  $\Phi = 3$  mm) as the working electrode, an Ag/AgCl for PEC measurements or a saturated calomel electrode (SCE) for electrochemical measurements as the reference electrode, and a platinum wire as the counter electrode.

**Preparation of  $\text{Bi}_2\text{S}_3@\text{MoS}_2$  Nanoflowers.** The  $\text{Bi}_2\text{S}_3@\text{MoS}_2$  nanoflowers were synthesized by a solvothermal technique. Briefly, 0.97 g of  $\text{Bi}(\text{NO}_3)_3 \cdot 5\text{H}_2\text{O}$  and 0.456 g of thiourea were dissolved in a 50 mL mixture of ultrapure water and ethylene glycol (EG) with a volume ratio of  $V_{\text{H}_2\text{O}} : V_{\text{EG}} = 1 : 4$ . Then, the resultant homogeneous solution was transferred to a 100 mL Teflon-lined stainless-steel autoclave, and the autoclave was heated at 140 °C for 1 h, followed by cooling to room temperature. The products were separated centrifugally, washed with ultrapure water and ethanol for several times, and dried under vacuum. Subsequently, 0.1 g of  $\text{Bi}_2\text{S}_3$  powder was ultrasonically dispersed in 10 mL of ultrapure water. 0.075 g of  $\text{Na}_2\text{MoO}_4 \cdot 2\text{H}_2\text{O}$  and 75  $\mu\text{L}$  of PDDA (20 wt.%) were added to above  $\text{Bi}_2\text{S}_3$  dispersion. Next, 0.2 g of thiourea was added to the mixture, and then the mixture was diluted to 20 mL under vigorously stirring for 1 h. Finally, the obtained solution was maintained at 200 °C for 24 h in a 30 mL Teflon-lined stainless-steel autoclave. After cooling to room temperature, the black products were separated centrifugally, washed with ultrapure water and ethanol for several times, and dried under vacuum.

**Self-Assembly of Tetrahedral DNA Nanostructure at the Modified Electrode.** The tetrahedral DNA nanostructure consisted of four DNA strands was formed based on a modified protocol.<sup>1,2</sup> Tetrahedron A, B, C, and D were separately dissolved in TM buffer (10 mM Tris-HCl, 50 mM  $\text{MgCl}_2$ , pH 8.0), yielding a final concentration of 50  $\mu\text{M}$ . Each strand (2  $\mu\text{L}$ ) was mixed with TCEP (10  $\mu\text{L}$ , 30 mM) and 82  $\mu\text{L}$  of TM buffer. Afterward, the resulting mixture was heated to 95 °C for 2 min and then cooled to 4 °C. The final concentration of tetrahedron-structured probe (TSP) is 1  $\mu\text{M}$ . Prior to surface modification, the GCE was polished with alumina slurry, followed by sonicating in anhydrous ethanol and ultrapure water. The well-polished bare GCE was first coated with as-prepared  $\text{Bi}_2\text{S}_3@\text{MoS}_2$  nanoflowers dispersion (4  $\mu\text{L}$ , 2  $\text{mg mL}^{-1}$ ) and evaporated in air. The  $\text{Bi}_2\text{S}_3@\text{MoS}_2$  nanocomposites on the GCE would turn into stable film used as the substrate of the PEC biosensor, and then the colloidal GNPs were adsorbed on the composite by immersing

Bi<sub>2</sub>S<sub>3</sub>@MoS<sub>2</sub>/GCE into a colloidal GNPs solution for 8 h. After being rinsed and dried, 10  $\mu$ L of TSP was added to the modified electrode surface and allowed to react overnight at room temperature.

**Preparation of Signal Probe.** First, the ligation probe probe-N<sub>3</sub> (10  $\mu$ L, 100  $\mu$ M) was added to 240  $\mu$ L of a mixture of EDC and NHS (4:1) and then stirred over 12 h to activate the carboxyl at room temperature. Subsequently, DA (250  $\mu$ L, 20 mM) was added to the obtained probe-N<sub>3</sub> mixture, simultaneously stirring for 2 h to obtain the signal probe (P<sub>DA</sub>-N<sub>3</sub>, 2  $\mu$ M probe-N<sub>3</sub>, 10 mM DA) *via* amidation reaction.

**CV and PEC Characterization of the PEC Biosensor.** To confirm the fabrication process of the PEC biosensor, the electrochemical characterization of the stepwise-modified electrode was executed by cyclic voltammograms (CVs) in 5.0 mM [Fe(CN)<sub>6</sub>]<sup>3-/4-</sup> solution. As shown in Figure S1A, a couple of quasi-reversible redox peaks are obtained at the bare GCE (curve a). After being modified with the Bi<sub>2</sub>S<sub>3</sub>@MoS<sub>2</sub> nanoflowers on the bare GCE surface, an obvious decrease in redox peak current is achieved (curve b). Then GNPs are introduced onto the electrode, and the redox peak current is enhanced, indicating that GNPs provide excellent conductivity and large surface area to promote the electron transfer (curve c). When the thiol-modified TSP is fabricated on the electrode with the help of GNPs, an obviously decreased peak current is observed due to its feature of obstructing the electron transfer (curve d). Followed by employing MCH to block nonspecific binding sites, a successive decline is obtained (curve e). The current further decreases after immobilizing target successfully (curve f), which is attributed to the hindrance of the electron transfer. As expected, when the modified electrode is incubated sequentially with H1, H2, and P<sub>DA</sub>-N<sub>3</sub>, the currents still decline (curves g, h).

The fabrication process of the PEC biosensor can also be studied by monitoring the photocurrent response, as shown in Figure S1B. A low background photocurrent is observed at the bare GCE (curve a). Then the Bi<sub>2</sub>S<sub>3</sub>@MoS<sub>2</sub>/GCE yields a significantly enhanced photocurrent (curve b) because the composite nanoflowers with the unique structure of MoS<sub>2</sub> nanosheet-coated Bi<sub>2</sub>S<sub>3</sub> nanoflowers exhibit photoactivity enhancement under a visible-light ( $\lambda > 400$  nm) illumination, resulting in high photon-to-electron conversion efficiency. After GNPs immobilization, the photocurrent evidently increases (curve c), because of the surface plasmon resonance (SPR) effect of GNPs, which increases the light absorption and enhances the charge separation. Moreover, GNPs can significantly enhance electrical conductivity, thus resulting in the obvious enhancement of photocurrent. The photocurrent decreases followed by the TSP and MCH immobilization (curves d,

e), and the photocurrent further decreases after the target is incubated (curve f). When H1 and H2 are bound by the HCR reaction, the photocurrent decreases moderately (curve g). The decrease in photocurrent intensity can be explained by increasing the steric-hindrance effect and decreasing the electron-transfer efficiency. Lastly, the P<sub>DA</sub>-N<sub>3</sub> is labeled to hybridize via CC, and the photocurrent increases remarkably (curve h), which is attributed to the introduction of the electron donor DA acting as a captor of photo-generated holes. Thus, all of these results demonstrate the successful fabrication of the PEC biosensor.

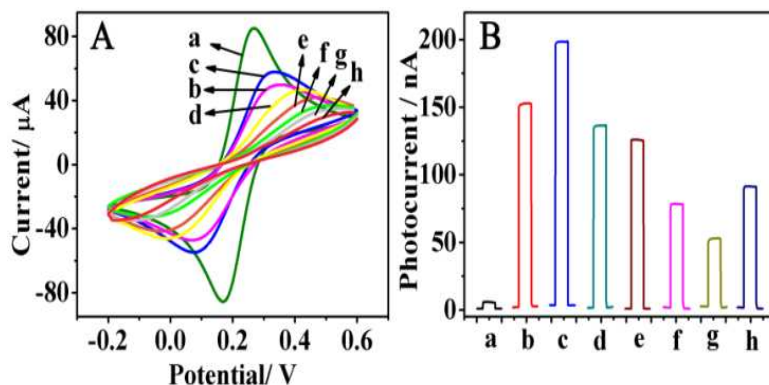

**Figure S1.** (A) CV profiles in 5.0 mM [Fe(CN)<sub>6</sub>]<sup>3-/4-</sup> at a scan rate of 50 mV/s and (B) photocurrent responses toward 0.5 nM miRNA of the prepared biosensor at the (a) bare GCE, (b) Bi<sub>2</sub>S<sub>3</sub>@MoS<sub>2</sub>/GCE, (c) GNP/Bi<sub>2</sub>S<sub>3</sub>@MoS<sub>2</sub>/GCE, (d) TSP/GNP/Bi<sub>2</sub>S<sub>3</sub>@MoS<sub>2</sub>/GCE, (e) MCH/TSP /GNP/Bi<sub>2</sub>S<sub>3</sub>@MoS<sub>2</sub>/GCE, (f) miRNA/MCH/TSP/GNP/Bi<sub>2</sub>S<sub>3</sub>@MoS<sub>2</sub>/GCE, (g) H1, H2/miRNA /MCH/TSP/GNP/Bi<sub>2</sub>S<sub>3</sub>@MoS<sub>2</sub>/GCE, (h) P<sub>DA</sub>-N<sub>3</sub>/H1, H2/miRNA/MCH/TSP/GNP/Bi<sub>2</sub>S<sub>3</sub>@MoS<sub>2</sub>/GCE.

**Experimental Details for the Optimal Analytical Performance of the PEC Biosensor.** To achieve an optimal analytical performance of the PEC biosensor, several experimental conditions were investigated. As a PEC detection protocol, we first screened the alternatives of electron donors that may affect the electron-hole recombinant. We selected these substances including dopamine (DA), L-cysteine (L-cys), histidine (His), L-glutathione oxidized (GSSG), and respectively synthesized signal probes P<sub>DA</sub>-N<sub>3</sub>, P<sub>L-cys</sub>-N<sub>3</sub>, P<sub>His</sub>-N<sub>3</sub>, and P<sub>GSSG</sub>-N<sub>3</sub> (detailed synthesis method seen in the section of Preparation of Signal Probe). The photocurrent intensity of the resulting electrodes (detailed description about the construction of the resulting electrodes seen in the section of Self-Enhanced PEC Biosensor for MiRNA Assay) P<sub>X</sub>-N<sub>3</sub>/H1, H2/miRNA/MCH/TSP/GNP/Bi<sub>2</sub>S<sub>3</sub> @ MoS<sub>2</sub>/GCE (X= DA, L-cys, His, and GSSG) were recorded in 0.1 mol L<sup>-1</sup> phosphate buffer (pH 7.4) irradiated with a visible-light.

The hybridization time of HCR was evaluated by using the photocurrent response. When we constructed the resulting electrodes P<sub>DA</sub>-N<sub>3</sub>/H1, H2/miRNA/MCH/TSP/GNP/Bi<sub>2</sub>S<sub>3</sub> @ MoS<sub>2</sub>/GCE, the electrodes were respectively incubated with the mixture of 10 μL of H1 and 10 μL of H2 for 0.5,

1, 1.5, 2, 2.5 and 3 h to fulfill the HCR. The photocurrent intensity of the resulting electrodes was recorded in 0.1 mol L<sup>-1</sup> phosphate buffer (pH 7.4) irradiated with a visible-light. The reaction time of CC was also investigated. Similarly, when we constructed the resulting electrodes P<sub>DA-N<sub>3</sub></sub>/H1, H2/miRNA/MCH/TSP/GNPs/Bi<sub>2</sub>S<sub>3</sub> @ MoS<sub>2</sub>/GCE, the electrode was dipped with 20 μL of P<sub>DA-N<sub>3</sub></sub> at room temperature for 5, 10, 15, 20, 25, and 30 min incubation to fulfill the CC reaction. The photocurrent intensity of the resulting electrodes was recorded in 0.1 mol L<sup>-1</sup> phosphate buffer (pH 7.4) irradiated with a visible-light.

The concentration of DA was evaluated which is expected to affect the response signal. When we synthesize the signal probe P<sub>DA-N<sub>3</sub></sub> (detailed synthesis method is seen in the section of Preparation of Signal Probe), the final concentration of DA in P<sub>DA-N<sub>3</sub></sub> was optimized, including 1, 5, 7.5, 10, 30, and 50 mM. The photocurrent intensity of the resulting electrodes P<sub>DA-N<sub>3</sub></sub>/H1, H2/miRNA/MCH/TSP/GNPs/Bi<sub>2</sub>S<sub>3</sub> @ MoS<sub>2</sub>/GCE was recorded in 0.1 mol L<sup>-1</sup> phosphate buffer (pH 7.4) irradiated with a visible-light. Meanwhile, the effect of different introduction methods, such as CC and covalent bonding, of electron donor DA was investigated. Two kinds of trapped hairpins (H1, H2 and H1', H2') were designed. H1 and H2 modified DBCO can ligate P<sub>DA-N<sub>3</sub></sub> *via* CC to efficiently introduce DA. H1' and H2' modified COOH can introduce DA *via* covalent bonding. In our work, HCR was executed, and then P<sub>DA-N<sub>3</sub></sub> was ligated into the substrate. The resulting electrode was abbreviated as P<sub>DA-N<sub>3</sub></sub>/H1, H2/miRNA/MCH/TSP/GNPs/Bi<sub>2</sub>S<sub>3</sub> @ MoS<sub>2</sub>/GCE. In the control experiment, after HCR of H1' and H2', amidation reaction of DA with COOH groups at H1' and H2' was carried out. The resulting electrode was abbreviated as DA/H1', H2'/miRNA/MCH/TSP/GNPs/Bi<sub>2</sub>S<sub>3</sub> @ MoS<sub>2</sub>/GCE. The photocurrent intensity of those two kinds of resulting electrodes was recorded in 0.1 mol L<sup>-1</sup> phosphate buffer (pH 7.4) irradiated with a visible-light.

**Contribution of HCR to Signal Amplification.** To clarify the contribution of HCR to signal amplification, control experiment has been executed by using H1 only for miRNA detection, and the resulting electrode was abbreviated as P<sub>DA-N<sub>3</sub></sub>/H1/miRNA/MCH/TSP/GNPs/Bi<sub>2</sub>S<sub>3</sub>@MoS<sub>2</sub>/GCE. As shown in Figure S2, the photocurrent of the proposed biosensor in our work (curve b) is obviously higher than that of the sensor in the control experiment (curve a). Thus, HCR is vital to signal amplification in this proposed method.

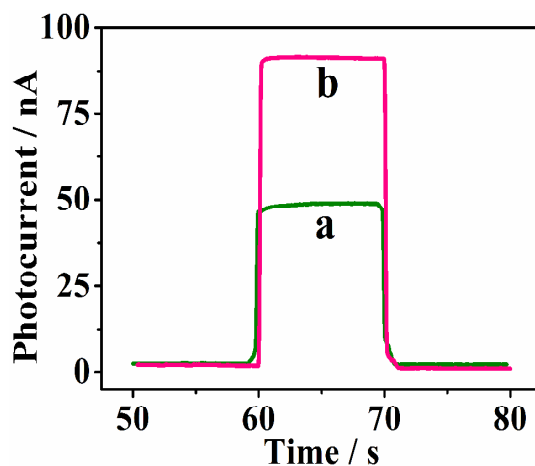

**Figure S2.** Photocurrent responses toward 0.5 nM miRNA at the (a)  $P_{DA-N_3}/H1/miRNA/MCH/TSP/GNPs/Bi_2S_3@MoS_2/GCE$ , and (b)  $P_{DA-N_3}/H1,H2/miRNA/MCH/TSP/GNPs/Bi_2S_3@MoS_2/GCE$ .

**Effect of the Amount of TSP.** The amount of TSP immobilized onto the surface of electrodes was optimized. The photocurrent response of the resulting electrodes was measured by incubating different amounts of TSP. As illustrated in Figure S3, the photocurrent increases with the augment of the amount of TSP. When the amount of TSP reaches  $10^{-11}$  mol (1  $\mu$ M 10  $\mu$ L), the photocurrent levels off. Considering the photocurrent intensity and the consumption of the reagents,  $10^{-11}$  mol (1  $\mu$ M 10  $\mu$ L) was chosen as the optimal amount of TSP.

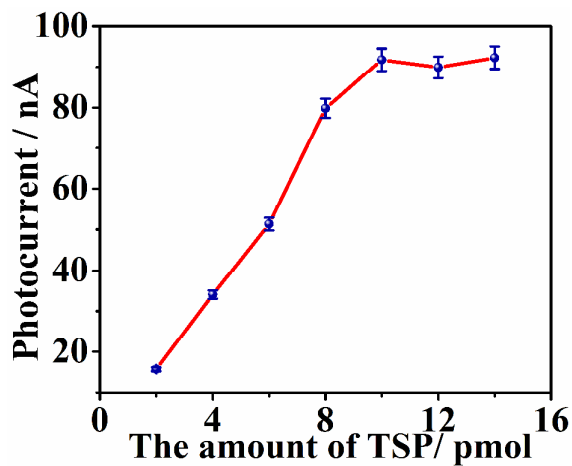

**Figure S3.** Effect of the amount of TSP at  $P_{DA-N_3}/H1, H2/miRNA/MCH/TSP/GNPs/Bi_2S_3@MoS_2/GCE$ .



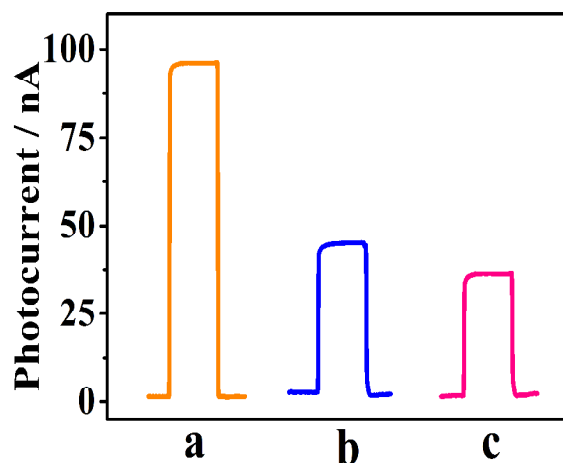

**Figure S4.** Photocurrent responses toward 0.5 nM miRNA at the (a)  $P_{DA-N_3}/H1, H2/miRNA/MCH/TSP/GNPs/Bi_2S_3@MoS_2/GCE$ , (b)  $P_{DA-N_3}@H1, P_{DA-N_3}@H2/miRNA/MCH/TSP/GNPs/Bi_2S_3 @ MoS_2/GCE$ , and (c)  $DA@H1', DA@H2'/miRNA/MCH/TSP/GNPs/Bi_2S_3 @ MoS_2/GCE$ .

**Certification of the Rational Design to Conduct CC after HCR.** To certify the rational design of conduct CC after HCR, control experiments were executed. First, two kinds of signal probes were synthesized. H1 and H2 respectively reacted with  $P_{DA-N_3}$  *via* CC to obtain signal probes  $P_{DA-N_3}@H1$  and  $P_{DA-N_3}@H2$ . H1' and H2' respectively reacted with DA *via* amidation reaction to obtain signal probes  $DA@H1'$  and  $DA@H2'$ . Then those two kinds of resulting electrodes were constructed and abbreviated severally as  $P_{DA-N_3}@H1, P_{DA-N_3}@H2/miRNA/MCH/TSP/GNPs/Bi_2S_3 @ MoS_2/GCE$  and  $DA@H1', DA@H2'/miRNA/MCH/TSP/GNPs/Bi_2S_3 @ MoS_2/GCE$ . In our work, the resulting electrode was abbreviated as  $P_{DA-N_3}/H1, H2/miRNA/MCH/TSP/GNPs/Bi_2S_3 @ MoS_2/GCE$ . As shown in Figure S4, the photocurrent response of curve a is much higher than that of curve b and curve a, thus certifying the rational design of conduct CC after HCR.

**Table S2. Comparison with Reported MiRNA Detection Methods.**

| Method            | Detection limit (fM) | Dynamic range (fM - nM) | Analysis time (h) | Ref       |
|-------------------|----------------------|-------------------------|-------------------|-----------|
| Photoluminescence | 3800                 | 3800 – 10               | 7                 | 3         |
| Photoluminescence | 1.0                  | 1.0 – 1.0               | >24               | 4         |
| Electrochemistry  | 0.1                  | 0.1 – 0.5               | 22                | 5         |
| Electrochemistry  | 0.4                  | 1.0 – 1.0               | 12                | 6         |
| ECL               | 0.5                  | 1.0 – 1.0               | 5                 | 7         |
| ECL               | –                    | 1.0 – 0.01              | -                 | 8         |
| PEC               | 1.7                  | 5.0 – 0.005             | 9.25              | 9         |
| PEC               | 0.027                | 0.1 – 0.5               | 5.25              | This work |

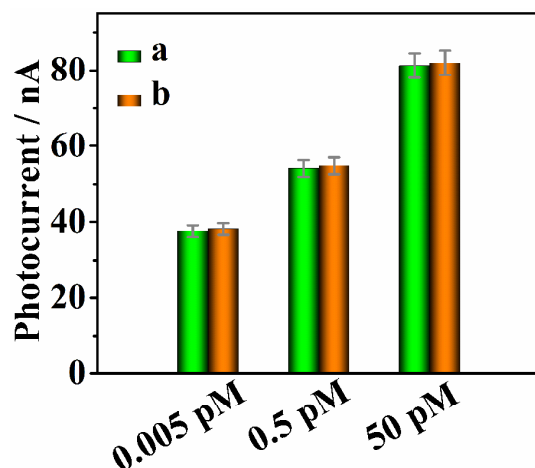

**Figure S5.** Photocurrent responses of the proposed biosensor towards 0.005, 0.5, and 50 pM miRNA in (a) TM buffer solution and (b) lysates from  $10^2$  cells of HeLa.

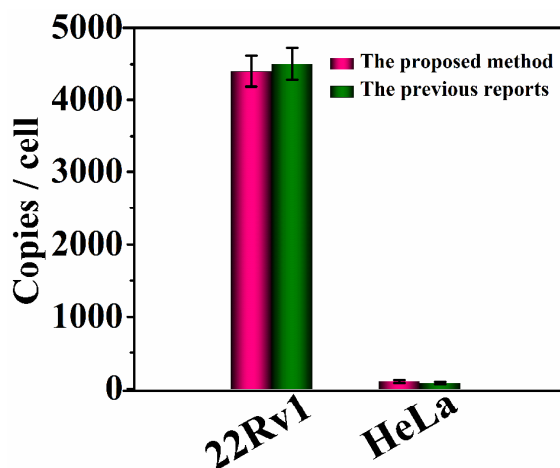

**Figure S6.** The number of copies of miRNA-141 per cell determined using our proposed method in 22Rv1 cell and HeLa cell compared with the previous reports.<sup>10,11</sup>

## References

- (1) Lin, M.; Wen, Y.; Li, L.; Pei, H.; Liu, G.; Song, H.; Zuo, X.; Fan, C.; Huang, Q. *Anal. Chem.* **2014**, *86*, 2285-2288.
- (2) Sadowski, J. P.; Calvert, C. R.; Zhang, D. Y.; Pierce, N. A.; Yin, P. *ACS Nano* **2014**, *8*, 3251-3259.
- (3) Wang, W.; Kong, T.; Zhang, D.; Zhang, J. N.; Cheng, G. S. *Anal. Chem.* **2015**, *87*, 10822-10829.
- (4) Causa, F.; Aliberti, A.; Cusano, A. M.; Battista, E.; Netti, P. A. *J. Am. Chem. Soc.* **2015**, *137*, 1758-1761.
- (5) Wang, T. Y.; Viennois, E.; Merlin, D.; Wang, G. L. *Anal. Chem.* **2015**, *87*, 8173-8180.
- (6) Miao, P.; Wang, B. D.; Chen, X. F.; Li, X. X.; Tang, Y. G. *ACS Appl. Mater. Interfaces* **2015**, *7*, 6238-6243.
- (7) Feng, Q. M.; Shen, Y. Z.; Li, M. X.; Zhang, Z. L.; Zhao, W.; Xu, J. J.; Chen, H. Y. *Anal. Chem.* **2016**, *88*, 937-944.
- (8) Liao, Y. H.; Huang, R.; Ma, Z. K.; Wu, Y. X.; Zhou, X. M.; Xing, D. *Anal. Chem.* **2014**, *86*, 4596-4604.
- (9) Wang, M.; Yin, H. S.; Shen, N. N.; Xu, Z. N.; Sun, B.; Ai, S. Y. *Biosens. Bioelectron.* **2014**, *53*, 232-237.
- (10) Liu, Y. Q.; Zhang, M.; Yin, B. C.; Ye, B. C. *Anal. Chem.* **2012**, *84*, 5165-5169.
- (11) He, X. W.; Zeng, T.; Li, Z.; Wang, G. L.; Ma, N. *Angew. Chem. Int. Ed.* **2015**, *54*, 1-5.
